# Supplementary material for: A Validated Composite Score Demonstrates Potential Superiority to MELD-Based Systems in Predicting Short-Term Survival in Patients with Liver Cirrhosis and Spontaneous Bacterial Peritonitis—A Preliminary Study
Source: MDPI journal article supplement (doi:10.3390/diagnostics13152578), 2023-08-02
Supplement: s1 [file s1]

**Supplementary Table S1. Model internal validation by 5-fold cross-validation**

| Predicting in-hospital mortality |         |       |           |           |           |             |
|----------------------------------|---------|-------|-----------|-----------|-----------|-------------|
| Dataset                          | Total N | AIC   | R-Square  | RMSE      | AUROC     | Brier Score |
| Train                            | 261     | 275.2 | 0.2566665 | 0.4178324 | 0.8148581 | 0.263008    |
| Test                             | 66      | 63.72 | 0.3990093 | 0.4047687 | 0.8365385 | 0.4610844   |
| accuracy = 0.7424242             |         |       |           |           |           |             |

**Supplementary Table S2. The cut-off values for the new SBP score model in predicting in-hospital mortality**

| Mortality above or below the cut-off values |                |
|---------------------------------------------|----------------|
| In-hospital, n=129 (39.4%)                  |                |
| In-hospital mortality new SBP score         | Mortality rate |
| $\geq -0.4697$                              | 73.38709677%   |
| $< -0.4697$                                 | 18.711921182%  |

**Supplementary Table S3. The cut-off values for the new SBP score model in predicting 3-month mortality**

| Mortality above or below the cut-off values |                |
|---------------------------------------------|----------------|
| Three-month, n=168 (51.4%)                  |                |
| Three-month mortality new SBP score         | Mortality rate |
| $\geq 0.3712$                               | 84.95575221%   |
| $< 0.3712$                                  | 33.64485981%   |

**Supplementary Table S4. The cut-off values for the new SBP score model in predicting 6-month mortality**

| Mortality above or below the cut-off values |                |
|---------------------------------------------|----------------|
| One month, n=199 (60.9%)                    |                |
| Six-month mortality new SBP score           | Mortality rate |
| $\geq 0.4690$                               | 83.66013072%   |
| $< 0.4690$                                  | 40.8045977%    |

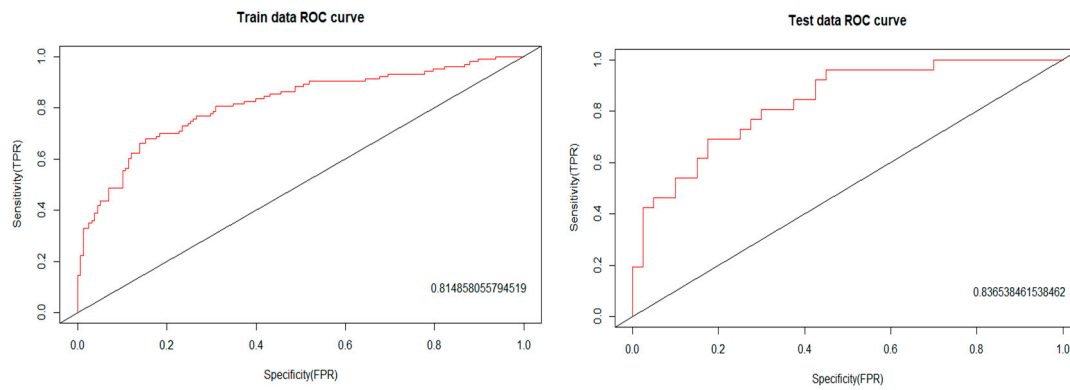

**Supplementary Figure S1. The AUROC curve of the training set and the test (validation) set for predicting in-hospital mortality.** The AUROC of the training cohort for the new SBP score was 0.815, and for the validation cohort, it was 0.837, both  $> 0.8$ .
